# Supplementary material for: Fatty Acid Content of Four Salmonid Fish Consumed by Indigenous Peoples from the Yamal-Nenets Autonomous Okrug (Northwestern Siberia, Russia)
Source: MDPI journal article supplement (doi:10.3390/ani12131643), 2022-06-27
Supplement: s1 [file s1]

## Supplementary Material

### Fatty acid content of four salmonid fish consumed by indigenous peoples from the Yamal-Nenets Autonomous Okrug (northwestern Siberia, Russia)

Alexander G. Dvoretzky <sup>1</sup>, Fatima A. Bichkaeva <sup>2</sup>, Olga S. Vlasova <sup>2</sup>, Sergei V. Andronov <sup>3</sup> and Vladimir G. Dvoretzky <sup>1,\*</sup>

<sup>1</sup> Murmansk Marine Biological Institute of the Russian Academy of Sciences (MMBI RAS), 183010 Murmansk, Russia; ag-dvoretzky@yandex.ru (A.G.D.)

<sup>2</sup> N. Laverov Federal Center for Integrated Arctic Research of the Ural Branch of the Russian Academy of Sciences (FECIAR UrB RAS), 163000 Arkhangelsk, Russia; fatima@fciarctic.ru (F.A.B.), olgawlassova@mail.ru (O.S.V.)

<sup>3</sup> National Medical Research Center for Rehabilitation of Balneology, Moscow 121099, Russia; sergius198010@mail.ru (S.V.A.)

\* Correspondence: v-dvoretzky@yandex.ru

**Table S1.** Analysis of similarity (ANOSIM): pair-wise comparisons of fatty acid content in fish species in the Gyda River, Russian Arctic.

| Group                                   | Group                                   | R-Statistic | P-level |
|-----------------------------------------|-----------------------------------------|-------------|---------|
| <i>Coregonus autumnnalis</i> (adult)    | <i>Coregonus autumnnalis</i> (juvenile) | 1           | 0.001   |
| <i>Coregonus autumnnalis</i> (adult)    | <i>Salvelinus alpinus</i>               | 1           | 0.001   |
| <i>Coregonus autumnnalis</i> (adult)    | <i>Coregonus muksun</i>                 | 0.506       | 0.002   |
| <i>Coregonus autumnnalis</i> (adult)    | <i>Coregonus sardinella</i>             | 1           | 0.001   |
| <i>Coregonus autumnnalis</i> (juvenile) | <i>Salvelinus alpinus</i>               | 1           | 0.001   |
| <i>Coregonus autumnnalis</i> (juvenile) | <i>Coregonus muksun</i>                 | 0.603       | 0.001   |
| <i>Coregonus autumnnalis</i> (juvenile) | <i>Coregonus sardinella</i>             | 1           | 0.001   |
| <i>Salvelinus alpinus</i>               | <i>Coregonus muksun</i>                 | 0.868       | 0.001   |
| <i>Salvelinus alpinus</i>               | <i>Coregonus sardinella</i>             | 1           | 0.001   |
| <i>Coregonus muksun</i>                 | <i>Coregonus sardinella</i>             | 0.471       | 0.001   |

**Table S2.** SIMPER results of fatty acid profile data in fish species in the Gyda Peninsula, Russian Arctic. Pair-wise SIMPER tests between fish species. Fatty acids are ranked from the most to the least significant driver of the total dissimilarity, Contib% indicates contributions to the total dissimilarity.

| CAA CAJ          |          | CAA SA           |          | CAJ SA           |          | CAA CS           |          | CAJ CS           |          |
|------------------|----------|------------------|----------|------------------|----------|------------------|----------|------------------|----------|
| Av. Diss = 26.65 |          | Av. Diss = 12.69 |          | Av. Diss = 32.17 |          | Av. Diss = 14.40 |          | Av. Diss = 14.94 |          |
| FA               | Contrib% |
| C16:1C           | 13.12    | C18:1n9          | 11.21    | C18:1n9          | 15.05    | C18:1n9          | 12.56    | C16:1C           | 13.37    |
| C18:1n9          | 12.79    | C18:0            | 10.2     | C16:1C           | 10.24    | C16:1C           | 10.97    | C18:1n9          | 10.75    |
| C14:0            | 8        | C22:6n3          | 9.69     | C16:0            | 9.54     | C14:0            | 7.33     | C20:5n3          | 8.12     |
| C20:5n3          | 7.39     | C16:0            | 8.49     | C22:6n3          | 6.64     | C18:3n3          | 7.29     | C14:0            | 7.36     |
| C16:0            | 7.23     | C22:5n3          | 7.34     | C18:0            | 6        | C16:0            | 6.32     | C16:0            | 7.1      |
| C18:3n3          | 6.93     | C20:5n3          | 7.06     | C14:0            | 5.37     | C20:5n3          | 5.74     | C22:6n3          | 6.38     |
| C18:2n6          | 5.36     | C22:5n6          | 4.56     | C22:5n3          | 5.11     | C18:2n6          | 5.44     | C18:3n3          | 5.2      |
| C20:1            | 3.66     | C16:1t           | 4.05     | C18:2n6          | 4.34     | C18:3n6          | 3.83     | C18:2n6          | 4.27     |
| C20:4n6          | 3.06     | C22:4n6          | 3.83     | C18:3n3          | 3.91     | C20:1            | 3.72     | C18:3n6          | 4.07     |
| C22:6n3          | 2.63     | C18:3n3          | 2.72     | C22:5n6          | 3.33     | C20:4n6          | 3.18     | C18:0            | 3.05     |
| C20:2n6          | 2.31     | C24:1            | 2.59     | C20:1            | 3.29     | C16:1t           | 2.88     | C20:1            | 2.91     |
| C16:1t           | 2.24     | C17:1            | 2.07     | C20:4n6          | 2.91     | C22:5n3          | 2.18     | C20:4n6          | 2.37     |
| C22:5n3          | 2.09     | C22:0            | 2.03     | C22:4n6          | 2.76     | C20:2n6          | 2.02     | C20:2n6          | 2.26     |
| C20:3n3          | 1.96     | C20:3n3          | 1.65     | C24:1            | 2.4      | C20:3n3          | 2.01     | C22:0            | 1.89     |
| C17:1            | 1.61     | C22:2n6          | 1.62     | C20:3n3          | 2.28     | C17:1            | 1.87     | C22:5n3          | 1.62     |
| C24:1            | 1.52     | C20:3n6          | 1.49     | C20:5n3          | 2.17     | C15:0            | 1.62     | C22:5n6          | 1.58     |
| C22:0            | 1.51     | C14:0            | 1.38     | C20:2n6          | 1.71     | C20:3n6          | 1.5      | C24:1            | 1.55     |
| C22:5n6          | 1.5      | C18:2n6t         | 1.37     | C20:3n6          | 1.62     | C17:0            | 1.49     | C20:3n3          | 1.55     |
| SA               | CS       | CAA              | CM       | CAJ              | CM       | SA               | CM       | CS               | CM       |
| Av. Diss = 21.19 |          | Av. Diss = 15.80 |          | Av. Diss = 17.38 |          | Av. Diss = 17.32 |          | Av. Diss = 11.94 |          |
| FA               | Contrib% |
| C18:1n9C         | 15.14    | C18:3n3          | 10.82    | C18:1n9c         | 13.76    | C18:1n9c         | 14.68    | C18:1n9c         | 10.46    |
| C16:0            | 9.47     | C16:1c           | 8.97     | C16:1c           | 12.37    | C22:6n3          | 10.48    | C22:5n3          | 10.31    |
| C16:1C           | 7.23     | C20:5n3          | 8.32     | C22:5n3          | 9.35     | C16:0            | 9.29     | C16:1c           | 7.04     |
| C18:0            | 6.69     | C18:1n9c         | 7.21     | C14:0            | 8.87     | C16:1C           | 7.8      | C22:6n3          | 6.07     |
| C22:5n3          | 6.19     | C18:2n6c         | 6.99     | C16:0            | 8.76     | C18:3n3          | 6.58     | C14:0            | 6.05     |
| C22:6n3          | 5.91     | C22:5n3          | 5.22     | C18:0            | 4.48     | C18:0            | 6.57     | C18:3n3          | 5.89     |
| C14:0            | 3.93     | C18:3n6          | 4.31     | C24:1            | 3.9      | C18:2n6c         | 6.14     | C16:0            | 5.41     |
| C18:2n6C         | 3.77     | C14:0            | 4.27     | C18:3n6          | 3.77     | C22:5n6          | 4.45     | C20:5n3          | 4.42     |
| C22:5n6          | 3.76     | C22:6n3          | 3.49     | C20:1            | 3.74     | C20:3n3          | 3.84     | C24:1            | 3.36     |
| C18:3n3          | 3.46     | C20:2n6          | 3.47     | C20:5n3          | 3.34     | C20:4n6          | 3.22     | C20:1            | 3.03     |
| C22:4n6          | 3.38     | C16:1t           | 3.42     | C22:4n6          | 2.93     | C18:3n6          | 2.96     | C22:4n6          | 2.93     |
| C20:1            | 3.01     | C16:0            | 3.18     | C22:6n3          | 2.53     | C20:2n6          | 2.75     | C18:2n6c         | 2.86     |
| C20:4n6          | 2.78     | C20:3n3          | 3.14     | C22:1            | 2.28     | C20:1            | 2.67     | C18:0            | 2.52     |
| C24:1            | 2.5      | C20:4n6          | 2.76     | C17:0            | 2.24     | C22:4n6          | 2.4      | C20:2n6          | 2.33     |
| C20:3n3          | 2.33     | C20:1            | 2.24     | C20:4n6          | 2.13     | C14:0            | 2.35     | C17:0            | 2.02     |
| C18:3n6          | 2.14     | C22:0            | 2.23     | C15:0            | 1.73     | C22:2n6          | 1.69     | C22:0            | 1.93     |
| C20:3n6          | 1.91     | C17:1            | 2.17     | C20:3n6          | 1.65     | C22:5n3          | 1.59     | C20:3n3          | 1.87     |
| C22:2n6          | 1.73     | C18:0            | 1.85     | C22:5n6          | 1.4      | C20:3n6          | 1.47     | C20:4n6          | 1.84     |

Note: CAA – *Coregonus autumnalis* (adult specimens), CAJ – *Coregonus autumnalis* (juvenile specimens), SA – *Salvelinus alpinus*, CM – *Coregonus muksun*, CS – *Coregonus sardinella*

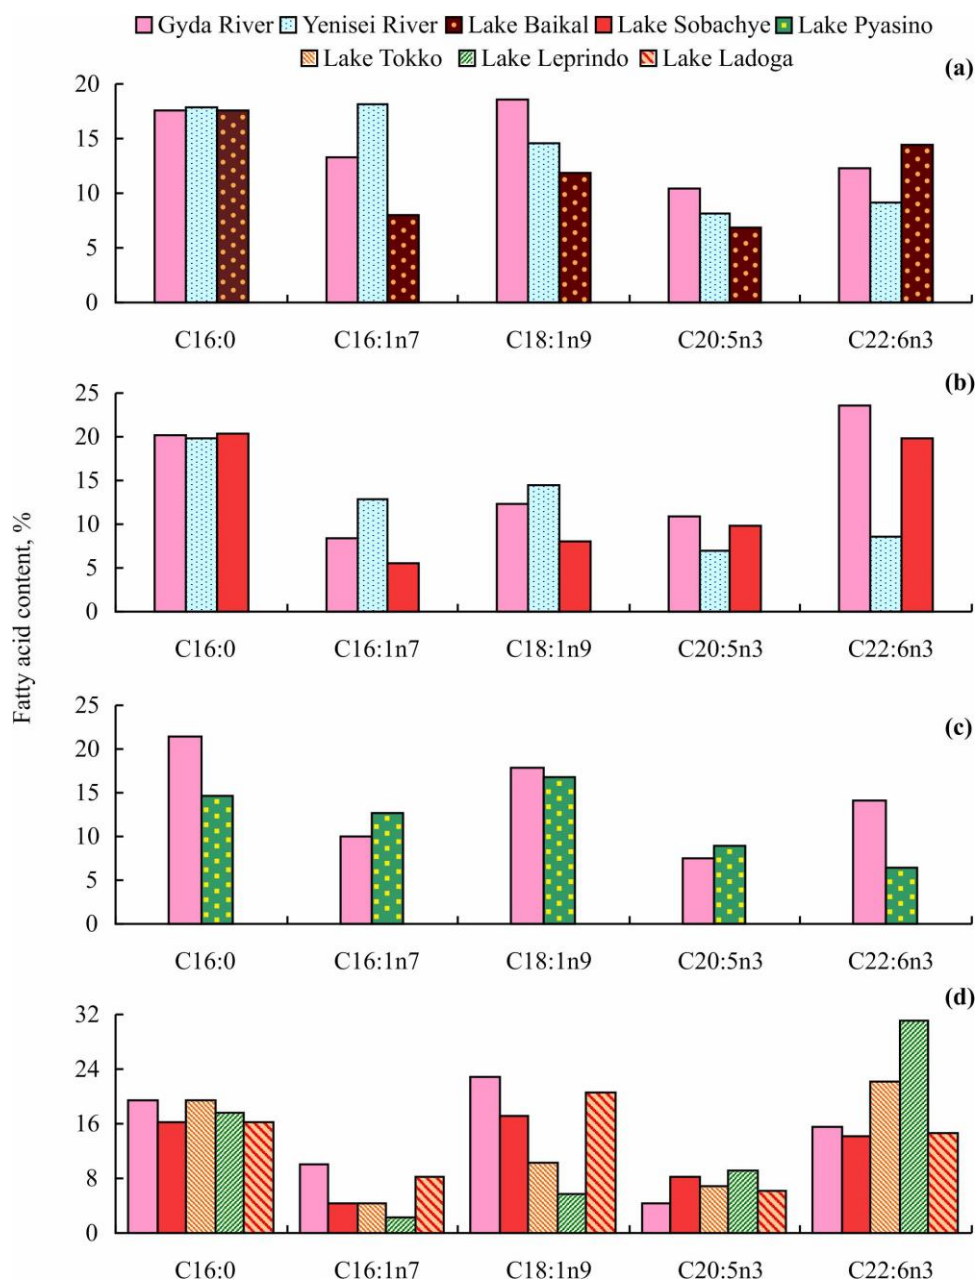

**Figure S1.** Spatial variations in fatty acid profiles (%) of salmonid fish from different habitats. **(a)** – Arctic cisco *Coregonus autumnalis* (adult), **(b)** – least cisco *Coregonus sardinella*, **(c)** – muksun *Coregonus muksun*, **(d)** – Arctic charr *Salvelinus alpinus*. Sources: Gyda River (Arctic, Siberia) – present study; Yenisei River (sub-Arctic, Siberia) – Gladyshev et al. (2017); Lake Baikal (temperate zone, Siberia) – Nikiforova et al. (2020); Lake Sobachye (sub-Arctic, Siberia), least cisco – Gladyshev et al. (2017), Arctic charr – Gladyshev et al. (2022); Lake Pyasino (Arctic, Siberia) – Sushchik et al. (2020); Lake Tokko, Lake Leprindo (temperate zone, Siberia), Lake Ladoga (subarctic zone, Karelia) – Gladyshev et al. (2022).

Gladyshev, M.I.; Sushchik, N.N.; Makhutova, O.N.; Glushchenko, L.A.; Rudchenko, A.E.; Makhrov, A.A.; Borovikova, E.A.; Dgebuadze, Y.Y. Fatty acid composition and contents of seven commercial fish species of genus *Coregonus* from Russian subarctic water bodies. *Lipids* **2017**, *52*, 1033–1044.

Gladyshev, M.I.; Makhrov, A.A.; Baydarov, I.V.; Safonova, S.S.; Golod, V.M.; Alekseyev, S.S.; Glushchenko, L.A.; Rudchenko, A.E.; Karpov, V.A.; Sushchik, N.N. Fatty acid composition and contents of fish of genus *Salvelinus* from natural ecosystems and aquaculture. *Biomolecules* **2022**, *12*, 144.

Nikiforova, A.; Zamaratskaia, G.; Pickova, J. Fatty acid composition of salted and fermented products from Baikal omul (*Coregonus autumnalis migratorius*) *J. Food. Sci. Technol.* **2020**, *57*, 595–605.

Sushchik, N.N.; Makhutova, O.N.; Rudchenko, A.E.; Glushchenko, L.A.; Shulepina, S.P.; Kolmakova, A.A.; Gladyshev, M.I. Comparison of fatty acid contents in major lipid classes of seven salmonid species from Siberian Arctic lakes. *Biomolecules* **2020**, *10*, 419.
